# Supplementary material for: Microskeletal stiffness promotes aortic aneurysm by sustaining pathological vascular smooth muscle cell mechanosensation via Piezo1
Source: PubMed Central journal article supplement (PMC8791986; doi:10.1038/s41467-021-27874-5), 2022-01-26
Supplement: 41467_2021_27874_MOESM2_ESM.pdf [file 41467_2021_27874_MOESM2_ESM.pdf]

## Description of Additional Supplementary Files

File Name: Supplementary Data 1

Description: Transcriptome with differential expression patterns in VSMC niched in AAA compared to controls mice.

File Name: Supplementary Data 2

Description: Library of differentially expressed genes from published RNAseq dataset of aorta isolated from  $Ntn1^{flox/flox}$  mice and  $Ntn1^{flox/flox}LysMcre^{+/-}$  mice.
